# Supplementary material for: Computational screening of iodine uptake in zeolitic imidazolate frameworks in a water-containing system
Source: Royal Society of Chemistry journal article supplement (doi:10.1039/c6cp02156e), 2016-01-01
Supplement: c6cp02156e1.pdf [file c6cp02156e1.pdf]

# **A Computational Screening of Iodine Uptakes in Zeolitic Imidazolate Frameworks in a Water-containing System**

## **Supporting Information**

Yue Yuan<sup>†‡</sup>, Xiuqin Dong<sup>†‡</sup>, Yifei Chen<sup>†‡</sup>, Minhua Zhang<sup>†‡\*</sup>

---

<sup>†</sup> Key Laboratory for Green Synthesis and Conversion of China Education Department, R&D Center for Petrochemical Technology, Tianjin University, Tianjin 300072, China

<sup>‡</sup> Collaborative Innovation Center of Chemical Science and Engineering, Tianjin 300072, China

\* Corresponding author: Tel: +86-22-27406119; Fax: +86-22-27406119;  
E-mail address: mhzhang@tju.edu.cn

**Table S1. Linker types of ZIFs**

| <b>name</b> | <b>composition</b>                      | <b>linker</b> | <b>Reference</b>                              |   |
|-------------|-----------------------------------------|---------------|-----------------------------------------------|---|
| ZIF-8       | Zn(mIm) <sub>2</sub>                    | mIm           | 2-methylimidazolate                           | 1 |
| ZIF-10      | Zn(Im) <sub>2</sub>                     | Im            | imidazolate                                   | 1 |
| ZIF-60      | Zn <sub>2</sub> (Im) <sub>3</sub> (mIm) | Im<br>mIm     | imidazolate<br>2-methylimidazolate            | 2 |
| ZIF-82      | Zn(cnIm)(nIm)                           | cnIm<br>nIm   | 4-cyanoimidazolate<br>2-nitroimidazolate      | 3 |
| ZIF-3       | Zn(Im) <sub>2</sub>                     | Im            | imidazolate                                   | 1 |
| ZIF-80      | Zn(dcIm)(nIm)                           | dcIm<br>nIm   | 4,5-dichloroimidazolate<br>2-nitroimidazolate | 3 |
| ZIF-2       | Zn(Im) <sub>2</sub>                     | Im            | imidazolate                                   | 1 |
| ZIF-67      | Co(mIm) <sub>2</sub>                    | mIm           | 2-methylimidazolate                           | 2 |
| ZIF-79      | Zn(mbIm)(nIm)                           | mbIm<br>nIm   | 5-methylbenzimidazolate<br>2-nitroimidazolate | 3 |
| ZIF-96      | Zn(cyamIm) <sub>2</sub>                 | cyamIm        | 5-cyanoaminoimidazolate                       | 4 |
| ZIF-90      | Zn(Ica) <sub>2</sub>                    | Ica           | imidazolate-2-carboxyaldehyde                 | 5 |
| ZIF-93      | Zn(almeIm) <sub>2</sub>                 | almeIm        | 4-aldemethylimidazolate                       | 4 |
| ZIF-69      | Zn(cbIm)(nIm)                           | cbIm<br>nIm   | 5-chlorobenzimidazolate<br>2-nitroimidazolate | 3 |
| ZIF-97      | Zn(hymeIm) <sub>2</sub>                 | hymeIm        | 4-hydroxymethyl-5-methylimidazolate           | 4 |
| ZIF-65      | Co(nIm) <sub>2</sub>                    | nIm           | 2-nitroimidazolate                            | 2 |
| ZIF-81      | Zn(brbIm)(nIm)                          | brbIm<br>nIm  | 5-bromobenzimidazolate<br>2-nitroimidazolate  | 3 |
| ZIF-78      | Zn(nbIm)(nIm)                           | nbIm<br>nIm   | 5-nitrobenzimidazolate<br>2-nitroimidazolate  | 3 |
| ZIF-25      | Zn(dmIm) <sub>2</sub>                   | dmeIm         | 4,5-dimethylimidazolate                       | 4 |
| ZIF-91      | Zn(hmIm) <sub>2</sub>                   | hmIm          | 2-hydroxymethylimidazolate                    | 5 |
| Y1          | Zn(Im) <sub>2</sub>                     | Im            | imidazolate                                   | 6 |
| Y3          | Zn(Im) <sub>2</sub>                     | Im            | imidazolate                                   | 6 |

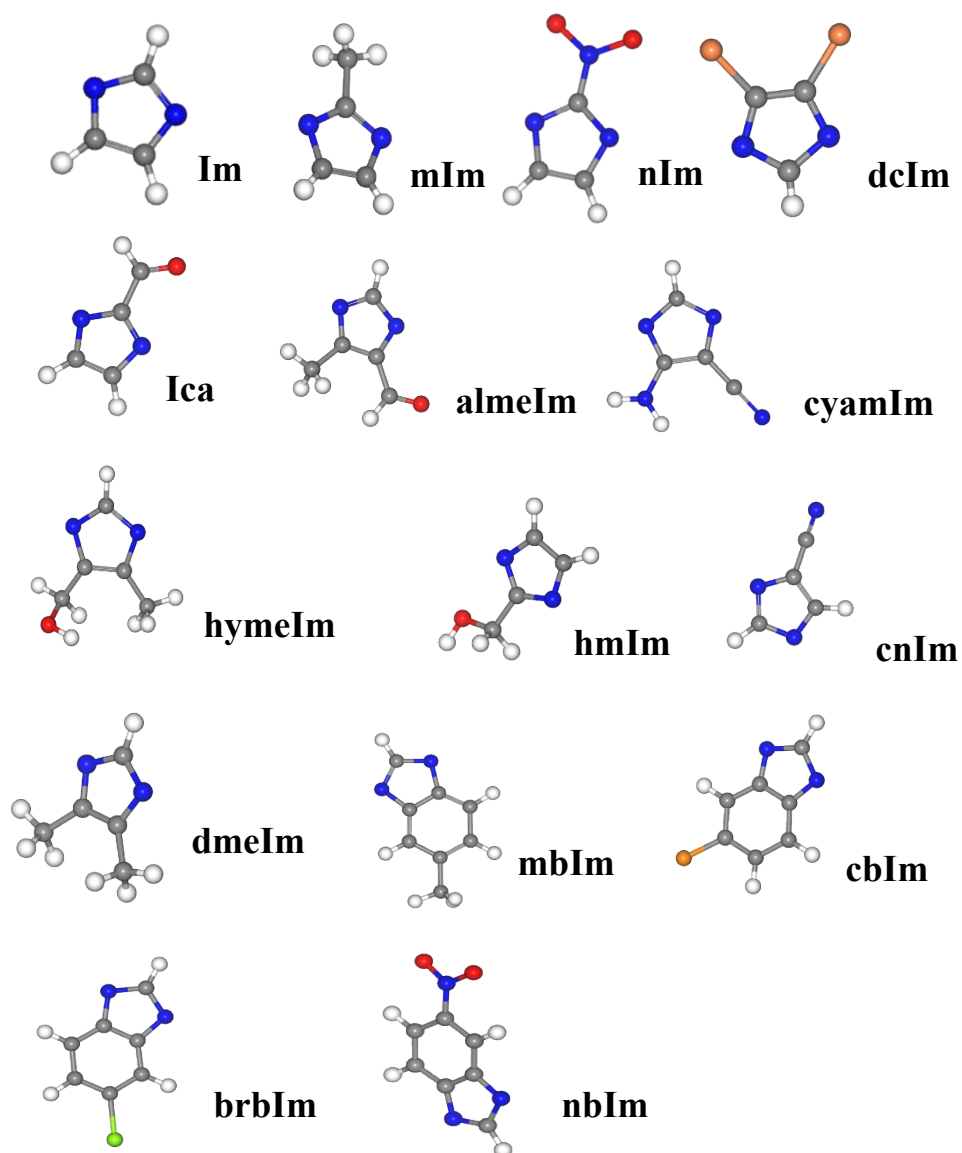

**Figure S1.** Linker types of ZIFs. Atom colors: C, Gray; H, white; N, blue; O, red; Cl, orange; Br, green.

**Table S2. Potential Parameters of ZIFs**

| site | $\sigma(\text{\AA})$ | $\epsilon/k_B(\text{K})$ |
|------|----------------------|--------------------------|
| C    | 3.431                | 52.79                    |
| H    | 2.571                | 22.122                   |
| N    | 3.26                 | 34.691                   |
| Zn   | 2.462                | 62.343                   |
| Co   | 2.559                | 7.039                    |
| O    | 3.118                | 30.166                   |
| Cl   | 3.516                | 114.128                  |
| Br   | 3.732                | 126.194                  |

**Table S3. Atomic charges of ZIF-10**

| Atom | Charge(e) |
|------|-----------|
| Zn   | 0.7979    |
| N1   | -0.3062   |
| N2   | -0.2750   |
| C1   | 0.0290    |
| C2   | 0.1544    |
| C3   | 0.0626    |
| C4   | -0.0687   |
| H1   | 0.0565    |
| H2   | 0.0097    |
| H3   | 0.0089    |
| H4   | 0.0546    |

**Table S4. Atomic charges ZIF-60**

| Atom | Charge(e) |
|------|-----------|
| Zn   | 0.8952    |
| N1   | -0.4839   |
| N2   | -0.3421   |
| C1   | 0.2288    |
| C2   | 0.0900    |
| C3   | 0.3896    |
| C4   | -0.0773   |
| C5   | -0.1633   |
| H1   | 0.0512    |
| H2   | 0.0070    |
| H3   | 0.0804    |
| H4   | 0.0477    |

**Table S5. Atomic charges of ZIF-82**

| Atom | Charge(e) |
|------|-----------|
| Zn   | 0.7910    |
| N1   | -0.2839   |
| N2   | -0.5342   |
| N3   | -0.4353   |
| N4   | 0.3770    |
| O    | -0.3579   |
| C1   | 0.1860    |
| C2   | 0.0102    |
| C3   | 0.0413    |
| C4   | 0.4037    |
| C5   | 0.4533    |
| C6   | 0.0490    |
| H1   | 0.0899    |
| H2   | 0.0429    |
| H3   | 0.0976    |

**Table S6. Atomic charges of ZIF-96**

| Atom | Charge(e) |
|------|-----------|
| Zn1  | 0.6342    |
| Zn2  | 0.9203    |
| N1   | -0.4847   |
| N2   | -0.7835   |
| N3   | -0.5257   |
| N4   | -0.3627   |
| C1   | 0.1640    |
| C2   | 0.5131    |
| C3   | -0.1342   |
| C4   | 0.4781    |
| H1   | 0.1706    |
| H2   | 0.2882    |

**Table S7. Structural parameters of ZIFs**

| <b>name</b>     | <b>unit cell (Å)</b>                                 | <b>cell angle (°)</b>                            | <b>atom number/unit</b> |
|-----------------|------------------------------------------------------|--------------------------------------------------|-------------------------|
| ZIF-8           | $\alpha = 16.991 \ \beta = 16.991 \ \gamma = 16.991$ | $\alpha = \beta = \gamma = 90^\circ$             | 276                     |
| ZIF-10          | $\alpha = 27.061 \ \beta = 27.061 \ \gamma = 19.406$ | $\alpha = \beta = \gamma = 90^\circ$             | 544                     |
| ZIF-60          | $\alpha = 27.245 \ \beta = 27.245 \ \gamma = 19.225$ | $\alpha = \beta = \gamma = 90^\circ$             | 592                     |
| ZIF-82          | $\alpha = 26.442 \ \beta = 22.899 \ \gamma = 18.970$ | $\alpha = \beta = 90^\circ \ \gamma = 120^\circ$ | 480                     |
| ZIF-3           | $\alpha = 18.970 \ \beta = 18.970 \ \gamma = 16.740$ | $\alpha = \beta = \gamma = 90^\circ$             | 272                     |
| ZIF-80          | $\alpha = 26.307 \ \beta = 22.783 \ \gamma = 19.361$ | $\alpha = \beta = 90^\circ \ \gamma = 120^\circ$ | 456                     |
| ZIF-96          | $\alpha = 28.356 \ \beta = 28.356 \ \gamma = 28.356$ | $\alpha = \beta = \gamma = 90^\circ$             | 1104                    |
| ZIF-67          | $\alpha = 16.959 \ \beta = 16.959 \ \gamma = 16.959$ | $\alpha = \beta = \gamma = 90^\circ$             | 276                     |
| ZIF-79          | $\alpha = 25.926 \ \beta = 22.452 \ \gamma = 19.653$ | $\alpha = \beta = 90^\circ \ \gamma = 120^\circ$ | 672                     |
| ZIF-2           | $\alpha = 9.679 \ \beta = 24.114 \ \gamma = 24.450$  | $\alpha = \beta = \gamma = 90^\circ$             | 272                     |
| ZIF-90          | $\alpha = 17.271 \ \beta = 17.271 \ \gamma = 17.271$ | $\alpha = \beta = \gamma = 90^\circ$             | 252                     |
| ZIF-93          | $\alpha = 28.357 \ \beta = 28.357 \ \gamma = 28.357$ | $\alpha = \beta = \gamma = 90^\circ$             | 1296                    |
| ZIF-69          | $\alpha = 26.084 \ \beta = 22.589 \ \gamma = 19.408$ | $\alpha = \beta = 90^\circ \ \gamma = 120^\circ$ | 600                     |
| ZIF-97          | $\alpha = 28.432 \ \beta = 28.432 \ \gamma = 28.432$ | $\alpha = \beta = \gamma = 90^\circ$             | 1488                    |
| ZIF-65          | $\alpha = 17.272 \ \beta = 17.272 \ \gamma = 17.272$ | $\alpha = \beta = \gamma = 90^\circ$             | 251                     |
| ZIF-81          | $\alpha = 25.993 \ \beta = 22.511 \ \gamma = 19.700$ | $\alpha = \beta = 90^\circ \ \gamma = 120^\circ$ | 600                     |
| ZIF-78          | $\alpha = 26.117 \ \beta = 22.618 \ \gamma = 19.491$ | $\alpha = \beta = 90^\circ \ \gamma = 120^\circ$ | 648                     |
| ZIF-25          | $\alpha = 27.788 \ \beta = 27.788 \ \gamma = 27.788$ | $\alpha = \beta = \gamma = 90^\circ$             | 1392                    |
| ZIF-91          | $\alpha = 16.604 \ \beta = 16.336 \ \gamma = 16.759$ | $\alpha = \beta = \gamma = 90^\circ$             | 300                     |
| Y1 <sup>b</sup> | $\alpha = 9.801 \ \beta = 24.104 \ \gamma = 24.356$  | $\alpha = \beta = \gamma = 90^\circ$             | 272                     |
| Y3 <sup>c</sup> | $\alpha = 18.389 \ \beta = 18.389 \ \gamma = 19.129$ | $\alpha = \beta = \gamma = 90^\circ$             | 272                     |

## References

- 1 K. S. Park, Z. Ni, A. P. Côté, J. Y. Choi, R. Huang, F. J. Uribe-Romo, H. K. Chae, M. O’Keeffe and O. M. Yaghi, *Proc. Natl. Acad. Sci. U. S. A.*, 2006, **103**, 10186–10191.
- 2 R. Banerjee, A. Phan, B. Wang, C. Knobler, H. Furukawa, M. O’Keeffe and O. M. Yaghi, *ReVision*, 2008, **319**, 939–943.
- 3 R. Banerjee, H. Furukawa, D. Britt, C. Knobler, M. O’Keeffe and O. M. Yaghi, *J. Am. Chem. Soc.*, 2009, **131**, 3875–3877.
- 4 W. Morris, B. Leung, H. Furukawa, O. K. Yaghi, N. He, H. Hayashi, Y. Houndonougbo, M. Asta, B. B. Laird and O. M. Yaghi, *J. Am. Chem. Soc.*, 2010, **132**, 11006–11008.
- 5 W. Morris, C. J. Doonan, H. Furukawa, R. Banerjee and O. M. Yaghi, *J. Am. Chem. Soc.*, 2008, **130**, 12626–12627.
- 6 Y. Q. Tian, Y. M. Zhao, Z. X. Chen, G. N. Zhang, L. H. Weng and D. Y. Zhao, *Chem. - A Eur. J.*, 2007, **13**, 4146–4154.
